# Supplementary material
Source: publisher site journal article supplement (https://www.dovepress.com/article/410732)
Supplement: Supplementary file 1 [file get_supplementary_file.php]

**Supplementary Data**

***Control Analyses: Multiple Linear Regressions on the whole sample with Nightmare Frequency (NMF) and Nightmare Distress as dependent variables.***

Both the regression models were statistically significant (p < 0.001). Specifically, the partial correlations show that younger age (t = -6.429; p < 0.001), female gender (t = 3.124; p = 0.002), and higher scores on Sleep Problem Index -SPI- (t = 7.401; p < 0.001) predict greater NMF. Additionally, the partial correlations reveal that female gender (t = 3.764; p < 0.001), higher scores on SPI (t = 5.576; p < 0.001), and poor sleep hygiene (t = 3.065; p = 0.002) predict higher Nightmare Distress.

**Table S1 Results of the multiple linear regressions considering Nightmare Frequency and Nightmare Distress during the third wave as dependent variables in the whole sample (N = 728)**

| **Dependent Variables** | **Predictors** | **Standardized β Coefficients** | **t** | ***p*** |
| --- | --- | --- | --- | --- |
| **NMF** |  |  |  |  |
| R = 0.465  adjusted R2 = 0.217  F = 24.838  p <0.001* | *Age* | -0.226 | -6.429 | <0.001* |
| *Gender* | 0.105 | 3.124 | 0.002* |
| *COVID-19-infected relatives/friends* | -0.047 | -1.396 | 0.163 |
|  | *COVID-19-died relatives/friends* | -0.041 | -1.235 | 0.217 |
|  | *Changes in physical relationships* | -0.019 | -0.550 | 0.583 |
|  | *Changes in online relationships* | 0.040 | 1.193 | 0.233 |
|  | *SPI* | 0.283 | 7.401 | <0.001* |
|  | *SHI* | 0.059 | 1.496 | 0.135 |
| **Nightmare Distress** |  |  |  |  |
| R = 0.361  adjusted R2 = 0.120  F = 13.446  p = <0.001* | *Age* | -0.040 | -1.067 | 0.286 |
| *Gender* | 0.133 | 3.764 | <0.001* |
| *COVID-19-infected relatives/friends* | 0.005 | 0.143 | 0.886 |
|  | *COVID-19-died relatives/friends* | -0.003 | -0.092 | 0.927 |
|  | *Changes in physical relationships* | -0.024 | -0.659 | 0.510 |
| *Changes in online relationships* | 0.026 | 0.725 | 0.469 |
| *SPI* | 0.225 | 5.576 | <0.001* |
| *SHI* | 0.126 | 3.065 | 0.002* |

*Asterisks indicate statistical significance

*NMF, Nightmare Frequency, SHI, Sleep Hygiene Index; SPI, Sleep Problem Index*
